# Supplementary material for: Study on the thermal decomposition behavior of ammonium perchlorate catalyzed by Zn–Co cooperation in MOF
Source: Royal Society of Chemistry journal article supplement (doi:10.1039/d2qi00968d), 2022-01-01
Supplement: d2qi00968d1.pdf [file d2qi00968d1.pdf]

## **Study on the thermal decomposition behavior of ammonium perchlorate catalyzed by Zn-Co cooperation in MOF**

Peng Zhou<sup>123</sup>, Siwei Zhang<sup>123</sup>, Zhuoqun Ren<sup>123</sup>, Yazhou Wang<sup>23</sup>, Yifu Zhang<sup>23</sup>\*,

Chi Huang<sup>123</sup>\* (Peng Zhou and Siwei Zhang have made same contributions)

College of Chemistry and Molecular Science<sup>1</sup>, Wuhan University, Wuhan,  
430072; Hubei Key Laboratory of Advanced Aerospace Propulsion Technology<sup>2</sup>,  
Wuhan 430072, China

Hubei Military-Civilian Integration and Co-Innovation Center of Aerospace  
Propulsion and Materials Technology<sup>3</sup>, Wuhan 430072, China

\*Corresponding author: [chihuang@whu.edu.cn](mailto:chihuang@whu.edu.cn); [yfzhang@dlut.edu.cn](mailto:yfzhang@dlut.edu.cn)

**Keywords:** MOF; ammonium perchlorate; synergy effect; thermal decomposition; catalytic mechanism.

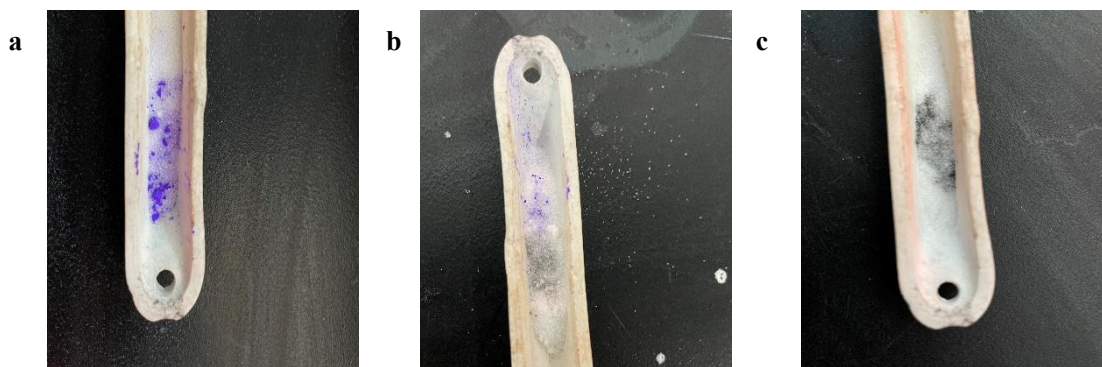

Fig. S1 The state of the mixture of ZnCo-ZIF and AP at room temperature (a), 240 °C (b) and 250 °C (c)

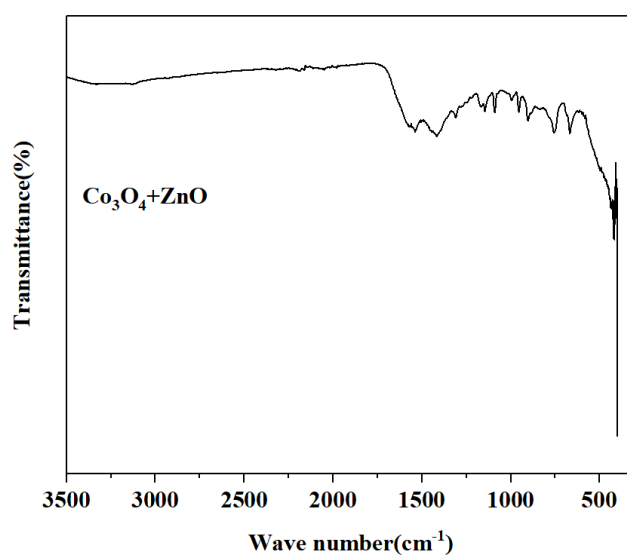

Fig. S2 FTIR test results of Co<sub>3</sub>O<sub>4</sub>/ZnO

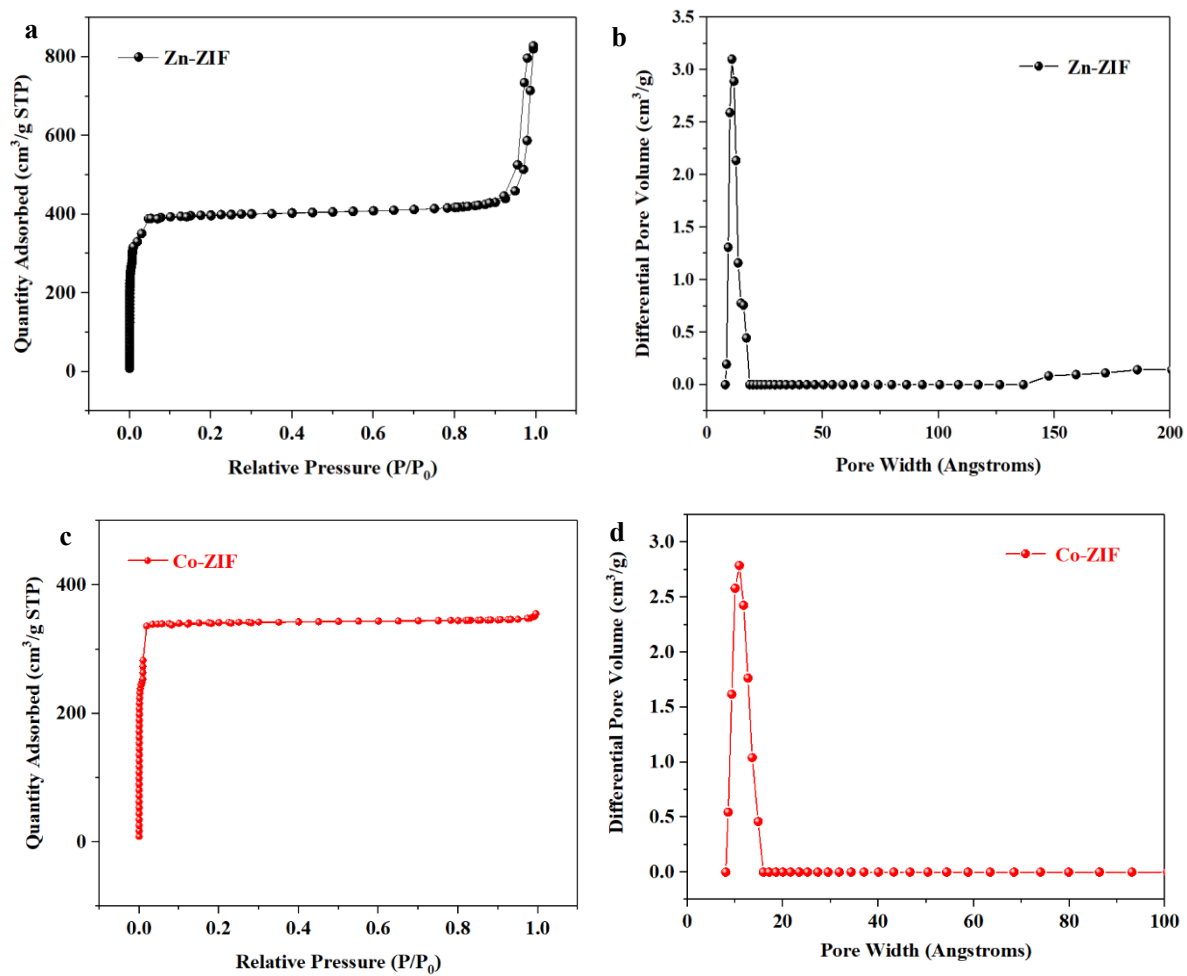

Fig. S3. Nitrogen adsorption/desorption isotherms (a, c) and corresponding pore size distribution plots (b, d) of Co-ZIF and Zn-ZIF.

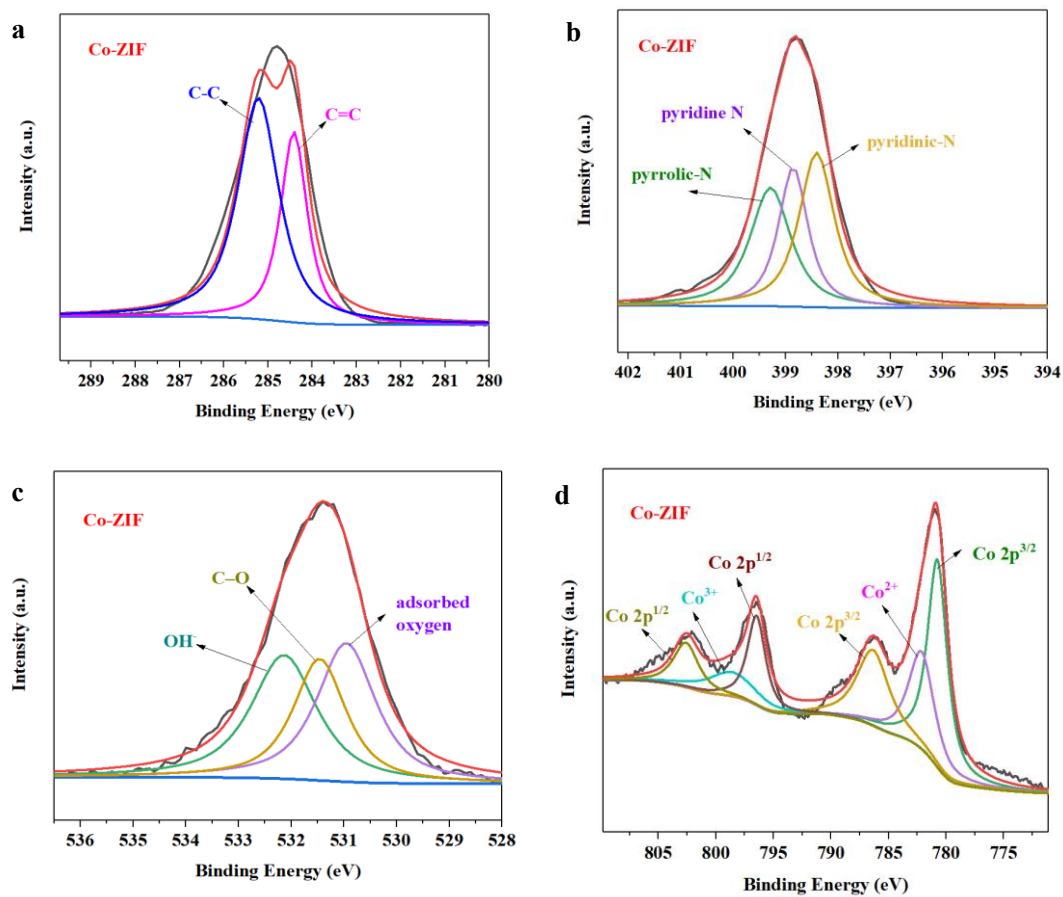

Fig. S4. C 1s (a), N 1s (b), O 1s (c) and Co 2p (d) XPS spectra of Co-ZIF.

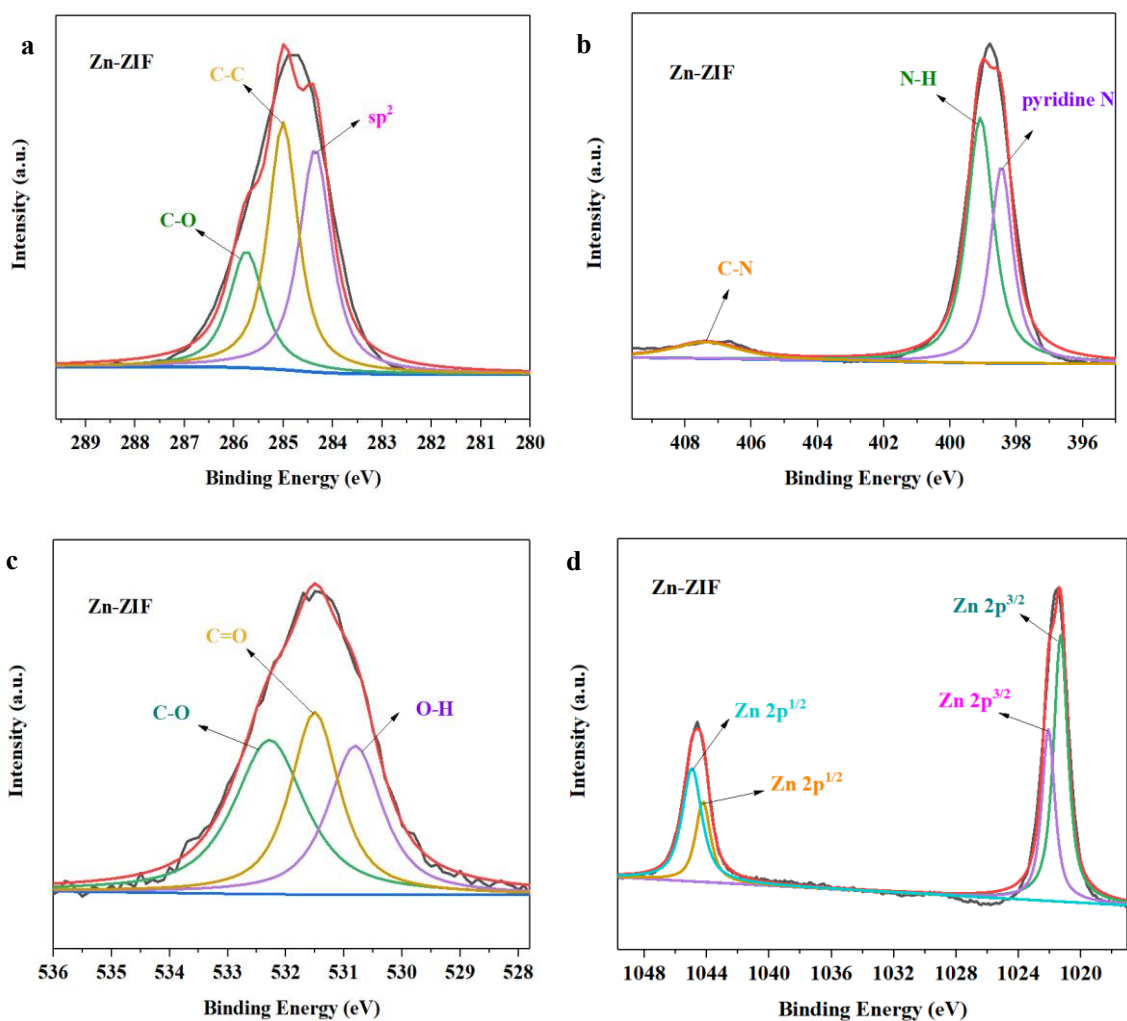

Fig. S5. C 1s (a), N 1s (b), O 1s (c) and Zn 2p (d) XPS spectra of Zn-ZIF.

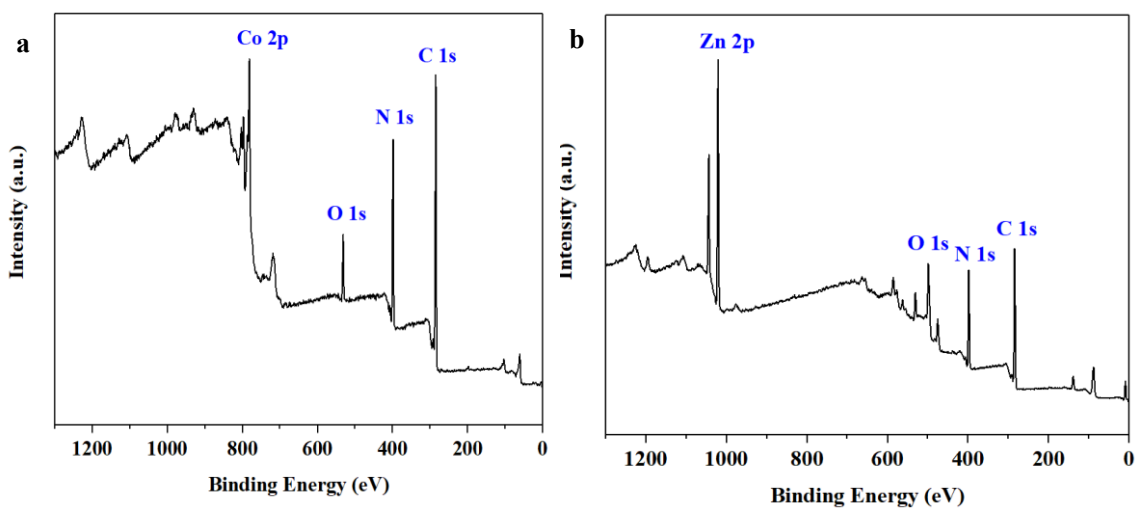

Fig. S6. XPS spectra of Co-ZIF (a) and Zn-ZIF (b).

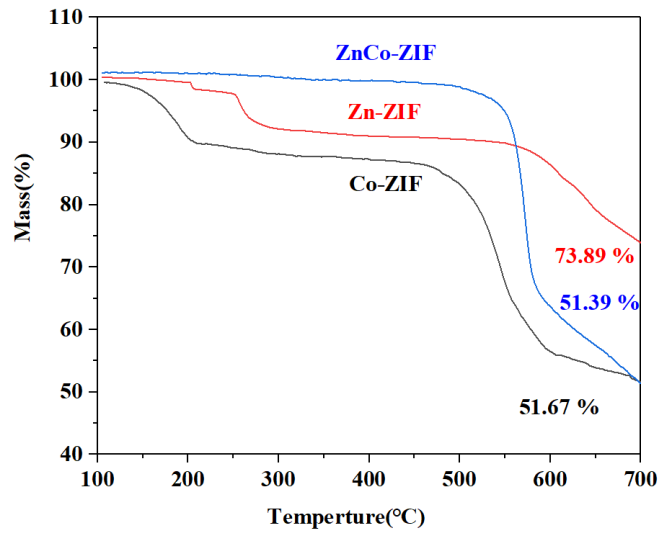

Fig. S7. TG of Co-ZIF、Zn-ZIF and ZnCo-ZIF.

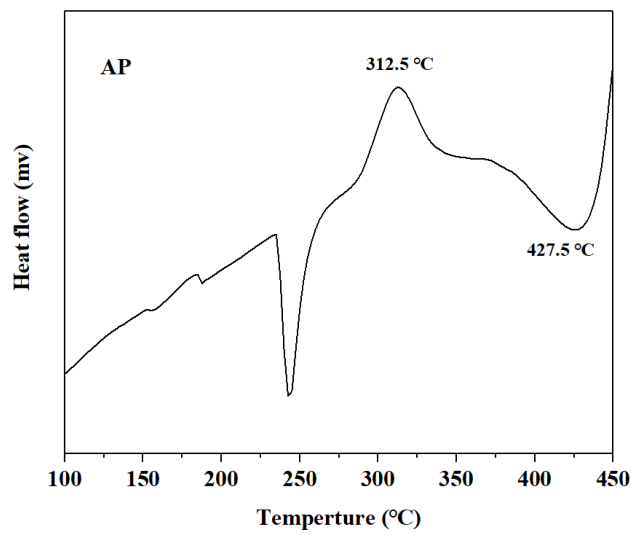

Fig. S8.AP thermal decomposition DSC test

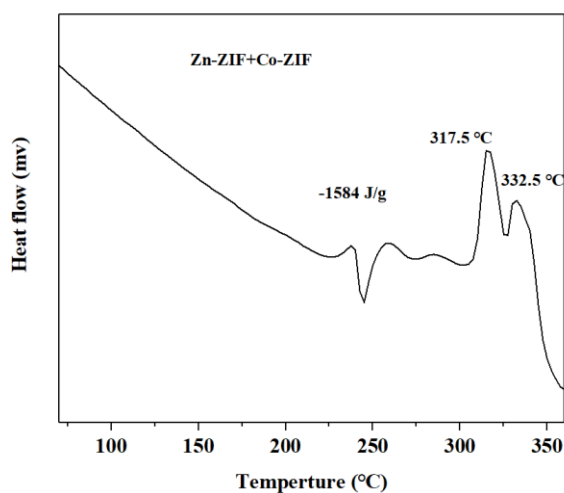

Fig. S9. Thermal decomposition effect of AP catalyzed by Zn-ZIF/Co-ZIF(the mass fractions of Zn ZIF and co ZIF are 1% respectively)

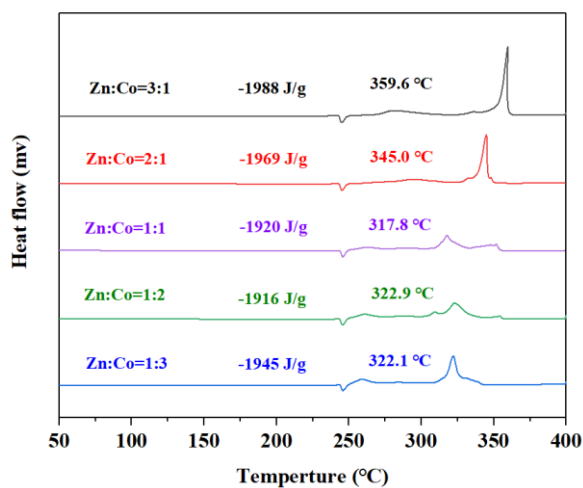

Fig. S10. Thermal decomposition of AP catalyzed by ZnCo ZIF with different Zn/Co molar ratios
